# Supplementary material
Source: publisher figshare collection journal article supplement (https://tandf.figshare.com/ndownloader/files/17986184)
Supplement: Supplementary file 1 [file 17986184]

**Identification of** **upstream transcription factors and an interacting PP2C protein of dehydrin *WZY2* gene in wheat**

**Hao Liua, Ying Yangab, Linsheng Zhanga***

**a. College of life science/State Key Laboratory of Crop Stress Biology for Arid Areas, Northwest A&F University, Yangling, Shannxi, China.**

**b. College of Nursing, Weinan Vocational&Technical College, Weinan, Shannxi, China.**

***Corresponding author E-mail:** [**linszhang@nwsuaf.edu.cn**](mailto:linszhang@nwsuaf.edu.cn)**.**

**Supporting information：**

**Supplemental Table 1. Real time PCR primers of *XM_020296294, XM_020341647, XM_020313116, and WZY2* genes.**

**Supplemental Table 2. Sequence of *XM_020296294*, *XM_020341647*, *XM_020313116*, *PP2C* and the promoter of *WZY2*.**

**Supplemental Table 1. Real time PCR primers of *XM_020296294, XM_020341647, XM_020313116, and WZY2* genes.**

| Genes | Primer name | Sequence (5'-3') |
| --- | --- | --- |
| *Actin* | Qactin F | ACCCAACCAGAAACAGCAAC |
|  | Qactin R | CTCATCCAACGAAACGGAAT |
| *XM_020296294* | XM_020296294 F | GCCGTTATGCTGGATGAGAT |
|  | XM_020296294 R | TTGATGGCCAATGTCTGGTA |
| *XM_020341647* | XM_020341647 F | GCTCCGATAATGTGCATCAA |
|  | XM_020341647 R | CCTTGATCTCTGCCACCATT |
| *XM_020313116* | XM_020313116 F | CAAGATCAGCCGTTGCAGTA |
|  | XM_020313116 R | TCAGTGGATGCAGATGAAGC |
| *WZY2* | WZY2 F | AGGCAAACATGGCAGACTTT |
|  | WZY2 R | AGCCAGACGTGTGGAGAAGT |

**Supplemental Table 2. Sequence of *XM_020296294*, *XM_020341647*, *XM_020313116*, *PP2C* and the promoter of *WZY2*.**

| **Gene ID** | **Sequence** |
| --- | --- |
| *XM_020296294* | ATGGCCTTTACGGCCGGGGGTCAGGATGAAGGGCCTAGTGTCTCTTGTCCCAAGAAGAGGAAAAGACCAAGCCAGGATCGTGGGGTGAAGCATGTACAGGAAGGGAGCCAGCAATTGGCAACTCTGGCTGCAAAGCAGGAGAAAGATGACGACGACAAAGATGAACCAAAGAGGCCTATTGGGACATCCAGAAAGTCCAACGGGAAGCAAACTGAGGATAAATCTGATGCGCCAAAGGAAGATTACATTCATATAAGAGCTCGAAGTGGCCAGGCTACAAACAGCCATAGTCTTGCAGAAAGGGTTCGGAGGGAAAAGATTAGTGAAAGGATGAAATTTCTTCAGGACCTTGTTCCTGGTTGTAGTAAAGTCATTGGTAAGGCCGTTATGCTGGATGAGATAATCAATTATGTTCAATCATTACAGCGGCAAGTTGAGTTTTTGTCGATGAAACTTTCAGCTGTCAATCCAGCACTAGACTTCAACATAGAGCGCATTCTATCTAAGGATTTATTTCAGTCTCAAGGAACTGCATCGTCTACCTTTGGCTTCTTACCAGACATTGGCCATCAATTTTTGCATCCACCAAAACATTCTCAAGCTGCGTTGCACAGCATTGTAAATCCCGCCGATGCATTTGGAAGGGTAACAAATGCTCCGGTAGGATGTACATTCAAAGAGGCCACACATCAGGTGCCCAATAATTTTGATGGAGAGTTCCACAACGTGATTGGGATGCCTTTTACCCTGTTTAATGACCACGAATCAAATGATAAACCTTGA |
| *XM_020341647* | ATGGCGCAAGAGAGTTGGAAAGAGGCAGAGGATACGGGTGTCCACGCGCCCGAGGCTCCGATAATGTGCATCAACAACTGTGGCTTCTTCGGGAACCGGATGACAGAGAACATGTGCTCAAAGTGTTACCGAGACACTGTCAAGGCCAAGAGCATGGCCCTTCTAGTTGAGAACAAAACTGCCGCTGCTGTTGCATCGTCACCCACACCAATGGTGGCAGAGATCAAGGATGAAGCGTCTGCCTCAGCCAAAGAAGGAAAACGAGTAGCCGAGGAAGAGGCGCCGAAGCCACCCAGCAACCGCTGCCTGTCGTGCCGGAAGAAGGTCGGGCTGACGGGGTTCAAGTGCCGCTGCGGAGACACCTTCTGCTCGATGCACCGCTACGCCGACGCGCACGATTGCAAGTTCGACTACAAGCAGGCCGGCAGGGAGCAGATCGCCCAGCAGAACCCGGTCGTCAAGGCTGACAAGGTCACCAGATTCTGA |
| *XM_020313116* | ATGGTGCCCAGGGACATGGTGAATGCCCCCGCCGAGAGGCCGCACGTCCAGGGGTCTGTCGTGAACAGGAAGTGCGAGAAGAAGGTGCCAAAGAAAATCCATAAGTCGGAGAGGGAGAAACGGAAGCGAGGCACACAGAATGACCTCTTTAATGAGTTGGGAGCCATGCTAGAACCAGACAGGCAGAACAACGGGAAGGCATGTGTATTGGGTGACACTACACGGATACTGAAGGATTTAGTTTCACAAGTGGAATCTCTTCGGAAGGAGAATAGCACACTGAAGAATGAATCTCACTATGTTGTGTTGGAGAGAAATGAACTGCGTGATGACAACAGCATGCTTCGCAATGAAATCCTGGAGCTTCAGAACAAGCTTAGAGTGCGTCTGCAAAGCAACCCTATTTGGAGCCAGGATACTACAAGATCAGCCGTTGCAGTACCTTATCCCACAAGCGGAATGTTCCCAGTACAACATTCGCCACACTCACCAGTCATCACCTCGACGGCACTTTCACTGCAACCTGTAATCACTGAGCAATGCTATGCCGCCCCACCACGAGAGCTGCAGCTCTTCCCGGAAGCTTCATCTGCATCCACTGAAGACAGCGAACTGTCACAAGACCAGGGGATTTCCAATAATGTGACACGGCCCCAGGCACGGTACCCAACACCAGCGGTGATGTCGCCAGTAAACGAATTCCCAATCCTTCCAAGGATGGGGGAGGAGCAACAATATAGTAGTGGCACTAGCGAGGAAGACGGTGTGCATAGGGTTTAA |
| *PP2C* | ATGTCTAATGCAGTAACCGCAATAGAAGAAGAGCCAAAAGATTCAATTGATCTTACAAGGGTACTAGAGAAGGCCCATAGTAGCACAACAGTGCCGGGTTCATCGACCGCATGTATCATTGCTATAACAAATCAGGGAATACAAGCAATTAATCTTGGTGACAGTGGCTTTATAGTCATCCGAGATGGCTGCACATTGTGTAGGTCACCTGTACAACAACATGATTTCAATTTCTCCTACCAACTTCAGAGTGGCAACTCGAGTGACTTGCCTAATGCTGCACAGGTCTTCAAGGTACCTGTCGCGTCTGGTGATGTAATTGTCGCTGGAACAGATGGGTTGTTCGATAACCTGTACAACAACGATATAACAGCTGTAGTGGTCCACGCAACCAGAGCTGGCCTGGAACCTCAAGTGACAGCCCAGAAGATAGCGGCGCTCGCACGCCAGCGGGCACAGGACAAGAACAGGCCGACGCCGTTTTCGACCGCGGCCCAAGACGCTGGGTACCGGTACTACGGCGGGAAGCTGGACGACATCACCGTCGTGGTCTCGTACGTAACTGCCTTTGGCAACTCGTAG |
| *wzy2* Promoter | GTCGTGGCTATGGTGATGCAACAACGATAAATTCAGCCACGGCTTTGGCAAGAATTTTGAGGCATGTAGTCATAGTCCATGTCGTTACCCAATGTCTAGCTGCTCCGATCTTGTATAGATTGATCCAATGTAAATTTAATTTAATTTCTGAAAAAACTGACGCGTTAGTACCATCCTTTAATAATGAAAATATGTTTGGCCTATTTTCTTTCTTTTTCATTCCATGCCGACACTTCCAGTTTTCATTTTCGGAGGCAAACATGGCAGACTTTTGCTAGAGGAAAGAACGTGTTTCAGGGACTGTATCCCCCGTGTGTTGTCGCTTCTACCTCGAGAACAAGCTGAGACGTGGCAACCCGGACGCGTCCAGTAGCTGCACACGCCTGCACTTCTCCACACGTCTGGCTTCTCTTTATGGGCGAGTCACTAATCACCGGCTCCCGCCGACCAGCCCACTCATGCCCGCACACGTAGCGCCCCCGACTATCCTATCCCATCGTTAAAGTCGCTTATAAATTGCGCCTGGTGCTGCACCTGCTTCCACAACCACAAGTTGCAGCCAAGTGAGCAAGACAACACACCATATTTCTGAGATAATCAAGATCAGCACCTGTGCAAG |
